# Supplementary material
Source: publisher figshare collection journal article supplement (https://karger.figshare.com/articles/dataset/_/5241901)
Supplement: Supplementary file 1 [file 1 › 000442403_sm_Erratum.pdf]

## Erratum

---

In the article by Long C, Blundell J, Finlayson G, entitled 'A Systematic Review of the Application And Correlates of YFAS-Diagnosed 'Food Addiction' in Humans: Are Eating-Related 'Addictions' a Cause for Concern or Empty Concepts?' [Obes Facts 2015;8:386–401, DOI:10.1159/000442403], the following changes in the disclosure statement need to be added:

### **Author Contributions**

GF and JB conceived of the review. CL performed the study selection, data extraction and analysis. CL, GF and JB interpreted the data and wrote the manuscript.

### **Disclosure Statement**

The authors received support from the European Union Seventh Framework Programme (FP7 2007–2013) under grant agreement numbers 266408 and 289800, and Sugar Nutrition UK. SNUK had no role in study selection, data extraction, analysis, interpretation or submission of this paper.
