# Supplementary material
Source: publisher figshare collection journal article supplement (https://karger.figshare.com/articles/dataset/_/5241901)
Supplement: Supplementary file 1 [file 1 › 000442403_sm_Table_1.pdf]

## Review Article

---

# A Systematic Review of the Application And Correlates of YFAS-Diagnosed 'Food Addiction' in Humans: Are Eating-Related 'Addictions' a Cause for Concern or Empty Concepts?

Cecilia G. Long   John E. Blundell   Graham Finlayson

School of Psychology, Faculty of Medicine and Health, University of Leeds, Leeds, UK

## Supplemental Material

**Supplemental Table 1.** Summary of experimental studies examining YFAS-diagnosed food addiction

| Investigators                                                                                 | Sample                                                          | Measures                                    | Prevalence                              |                                                                                                                                      |          | Correlates                                                                                                                                                                           |                      |                                                                                                                  | Critical Analysis                                                                                                                          |
|-----------------------------------------------------------------------------------------------|-----------------------------------------------------------------|---------------------------------------------|-----------------------------------------|--------------------------------------------------------------------------------------------------------------------------------------|----------|--------------------------------------------------------------------------------------------------------------------------------------------------------------------------------------|----------------------|------------------------------------------------------------------------------------------------------------------|--------------------------------------------------------------------------------------------------------------------------------------------|
|                                                                                               |                                                                 |                                             | Obese or Overweight                     | General Population                                                                                                                   | Children | Problematic Eating                                                                                                                                                                   | Weight Loss Outcomes | Psychological Wellbeing                                                                                          |                                                                                                                                            |
| Boggiano et al. (2014)<br>Appetite                                                            | 249 weight-loss seeking patients and 247 undergraduate students | PEMS, YFAS, BES, BMI                        | Mean YFAS symptom count of 3.1 (SD 1.7) | Mean YFAS symptom count of 1.9 (SD 1.3)                                                                                              |          | The YFAS correlated significantly with BES scores in both the overweight and control samples                                                                                         |                      |                                                                                                                  | Large sample size and control group but predominantly females and controls not well age or gender matched<br><br>Only self-report measures |
| Brunault, Ballon, Gaillard, Reveillere, and Courtois (2014)<br>Canadian Journal of Psychiatry | 553 French participants                                         | YFAS (translated to French), BES, BITE, BMI |                                         | 8.7% met FA diagnosis<br><br>Mean YFAS symptom count was 1.9 (SD 1.4)<br><br>Median number of food addiction criteria endorsed was 1 |          | YFAS symptom count was significantly correlated with BES total and BITE symptom scores.<br><br>Dichotomous FA diagnosis was significantly correlated with higher BES and BITE scores |                      |                                                                                                                  | Large sample size but did not report gender<br><br>Only self-report measures                                                               |
| Burgess, Kuran, Lokken, Morse, and Boggiano (2014)<br>Appetite                                | 150 college undergraduates; 106 female, 44 male                 | PEMS, BES, YFAS, SPSRQ                      |                                         |                                                                                                                                      |          | YFAS scores did contribute to some of the variance in BMI but failed to do so once BES scores were controlled                                                                        |                      | Significant associations between the PEMS subscales (social, coping, enhancement and conformity) and YFAS scores | Predominantly female sample with age and education biases<br><br>Laboratory measured BMI but self-reported questionnaires                  |

Legend: YFAS = Yale Food Addiction Scale; FA = Food Addiction; PEMS = Palatable Eating Motives Scale; BES = Binge Eating Scale; BMI = Body Mass Index; BITE = Bulimic Investigatory Test, Edinburgh; SPSRQ = Sensitivity to Punishment Sensitivity to Reward Questionnaire; WLT/S = Weight Loss Treatment/Surgery; CES-D = Centre for Epidemiological Studies Depression Scale; DEBQ = Dutch Eating Behaviour Questionnaire.

**Supplemental Table 1. Continued**

| Investigators                                                       | Sample                                         | Measures                                                                 | Prevalence                                                                                                                      |                    |          | Correlates                                                                                                                                                                                                                       |                                                                                                                |                                                                                                                                      | Critical Analysis                                                                                                                      |
|---------------------------------------------------------------------|------------------------------------------------|--------------------------------------------------------------------------|---------------------------------------------------------------------------------------------------------------------------------|--------------------|----------|----------------------------------------------------------------------------------------------------------------------------------------------------------------------------------------------------------------------------------|----------------------------------------------------------------------------------------------------------------|--------------------------------------------------------------------------------------------------------------------------------------|----------------------------------------------------------------------------------------------------------------------------------------|
|                                                                     |                                                |                                                                          | Obese or Overweight                                                                                                             | General Population | Children | Problematic Eating                                                                                                                                                                                                               | Weight Loss Outcomes                                                                                           | Psychological Wellbeing                                                                                                              |                                                                                                                                        |
| Burmeister, Hinman, Koball, Hoffmann, and Carels (2013)<br>Appetite | 51 overweight / obese patients seeking WLT     | YFAS, CES-D, BES, DEBQ                                                   | 19.6% of sample met FA criteria: 3 males, 8 females (YFAS symptom count)<br><br>Mean number of YFAS symptoms was 3.13 (SD 1.74) |                    |          | More YFAS symptoms was associated with higher self-reports of binge eating behaviours                                                                                                                                            | Individuals with higher YFAS scores lost a smaller percentage of body weight after the 7 week WLT intervention | Those who reported more YFAS symptoms also indicated experiencing greater depression                                                 | Small sample size, predominantly female<br><br>Weight loss measured after only 7 weeks, before any WL manipulation had begun           |
| Clark and Saules (2013)<br>Eating Behaviors                         | 67 post-WLS patients, 62% female               | YFAS, BES, MAST-AD, ASSIST                                               | 53.7% met criteria for FA                                                                                                       |                    |          | Significant relationship between YFAS symptom count and emotional eating and binge eating<br><br>Significant relationship between dichotomous YFAS diagnosis and emotional eating, binge eating and symptoms of eating disorders | Those meeting FA criteria has poorer total weight loss outcomes - 32% vs. 27% (not statistically significant)  | Those meeting FA diagnosis were more likely to admit post-WLS problematic substance use (not statistically significant)              | Small sample, predominantly female<br><br>All measures (inc. BMI) were self-reported<br><br>Retrospective reporting of pre-WLS answers |
| Davis et al. (2011)<br>Appetite                                     | 72 obese adult women (N = 49) and men (N = 23) | YFAS, EDE-Q, BDI, WURS-25, BIS, DGT, DDT, EPQ, BEQ, PFS, DEBQ, FCQ, EBPQ | 18 adults met FA diagnosis (13 female, 5 male)<br><br>25%                                                                       |                    |          | Significant correlation between FA and BED diagnosis<br><br>Food addicts reported more binge, hedonic and emotional eating                                                                                                       |                                                                                                                | Food addicts had a significantly higher prevalence of severe depression and were more likely to meet the criteria for childhood ADHD | Small sample, more than 2x more women than men<br><br>Two computerised behavioural tests (DGT and DDT)                                 |

Legend: MAST-AD = Michigan Assessment Screening Test for Alcohol and Drugs; ASSIST = Alcohol, Smoking and Substance Involvement Screening Test; EDE-Q = Eating Disorder Examination; BDI = Beck Depression Inventory; WURS-25 = Wender Utah ADHD Rating Scale; BED; Binge Eating Disorder; DGT = Delay of Gratification Task; DDT = Delay Discounting Task; EPQ = Eysenck Personality Questionnaire

**Supplemental Table 1. Continued**

| Investigators                                                                             | Sample                                                                                  | Measures                                                        | Prevalence                                                                                    |                    |          | Correlates                                                                                                                                                                                                                                                                                                                                                         |                      |                                                                                              | Critical Analysis                                                                                                                                                               |
|-------------------------------------------------------------------------------------------|-----------------------------------------------------------------------------------------|-----------------------------------------------------------------|-----------------------------------------------------------------------------------------------|--------------------|----------|--------------------------------------------------------------------------------------------------------------------------------------------------------------------------------------------------------------------------------------------------------------------------------------------------------------------------------------------------------------------|----------------------|----------------------------------------------------------------------------------------------|---------------------------------------------------------------------------------------------------------------------------------------------------------------------------------|
|                                                                                           |                                                                                         |                                                                 | Obese or Overweight                                                                           | General Population | Children | Problematic Eating                                                                                                                                                                                                                                                                                                                                                 | Weight Loss Outcomes | Psychological Wellbeing                                                                      |                                                                                                                                                                                 |
| Davis et al. (2013)<br>Physiology and Behavior                                            | 120<br>overeating/<br>overweight<br>women<br>(N=82) and<br>men (N=38)                   | YFAS, MLGP<br>score, PFS,<br>BEQ, DEBQ,<br>FCQ, EBPQ            | 21 participants<br>met food addiction<br>diagnosis (17.5%;<br>16 females, 5<br>males)         |                    |          | MLGP score higher<br>in FA group than<br>controls<br>The food addiction<br>group had<br>significantly higher<br>scores on all five<br>measures of eating<br>behaviour                                                                                                                                                                                              |                      |                                                                                              | Over 2X more<br>females than males<br><br>Thorough biological<br>measurement of<br>MLGP and BMI in<br>the lab but other<br>measures were self-<br>report                        |
| Davis, Levitan,<br>Kaplan,<br>Kennedy, and<br>Carter (2014)<br>Frontiers in<br>Psychology | 136<br>overweight/<br>obese<br>women<br>(N=92) and<br>men (N=44)                        | YFAS, FCQ,<br>appetite<br>ratings, snack<br>food<br>consumption | 23 met FA<br>diagnosis (16.9%)                                                                |                    |          | Food addicts<br>reported higher food<br>cravings and appetite<br>ratings<br>The FA group<br>showed no<br>suppression of<br>appetite when<br>administered<br>methylphenidate<br>compared to placebo<br>YFAS symptom<br>score was positively<br>associated with<br>hedonic<br>responsiveness<br>which mediated the<br>relationship between<br>A118G marker and<br>FA |                      |                                                                                              | Female-biased<br>sample<br><br>Measured actual<br>food consumption.<br><br>Found significant<br>differences in<br>responses to snack<br>food in FA compared<br>to non-FA groups |
| Davis and<br>Loxton (2014)<br>Nutrients                                                   | 145 adult<br>women<br>(N=100) and<br>men (N=45)                                         | Genotyping<br>(DNA<br>extraction),<br>YFAS, FPQ,<br>PFS, FCQ    | 25 met food<br>addiction<br>diagnosis (17.2%)                                                 |                    |          |                                                                                                                                                                                                                                                                                                                                                                    |                      |                                                                                              | Female-biased<br>sample<br><br>DNA extraction<br>allows comparison<br>of biological markers                                                                                     |
| Eichen, Lent,<br>Goldbacher, and<br>Foster (2013)<br>Appetite                             | 178<br>overweight/<br>obese WLT<br>seeking<br>females<br>(N=133) and<br>males<br>(N=45) | YFAS, BDI,<br>BMI                                               | 15.2% met FA<br>diagnosis<br>Average symptom<br>count in full<br>sample was 2.57<br>(SD 1.67) |                    |          |                                                                                                                                                                                                                                                                                                                                                                    |                      | Food addicts<br>(dichotomous and<br>symptom count) had<br>significantly higher<br>BDI scores | Female-biased<br>sample<br><br>Sample seeking<br>WLT - motivated to<br>report more severe<br>symptoms to qualify<br>for treatment                                               |

Legend: MLGP = Multilocus Genetic Profile; PFS = Power of Food Scale; BEQ = Binge Eating Questionnaire; FCQ = Food Craving Questionnaire; EBPQ = Eating Behaviours Patterns Questionnaire; FPQ = Food Preference Questionnaire

**Supplemental Table 1. Continued**

| Investigators                                                 | Sample                                                                      | Measures                                                                                                                                    | Prevalence          |                                                                                                     |          | Correlates                                                                                                                                                                                                                   |                      |                                                                                                                   | Critical Analysis                                                                                                                                  |
|---------------------------------------------------------------|-----------------------------------------------------------------------------|---------------------------------------------------------------------------------------------------------------------------------------------|---------------------|-----------------------------------------------------------------------------------------------------|----------|------------------------------------------------------------------------------------------------------------------------------------------------------------------------------------------------------------------------------|----------------------|-------------------------------------------------------------------------------------------------------------------|----------------------------------------------------------------------------------------------------------------------------------------------------|
|                                                               |                                                                             |                                                                                                                                             | Obese or Overweight | General Population                                                                                  | Children | Problematic Eating                                                                                                                                                                                                           | Weight Loss Outcomes | Psychological Wellbeing                                                                                           |                                                                                                                                                    |
| Flint et al. (2014)<br>American Journal of Clinical Nutrition | 134,175 female NHS nurses aged 45-88 years                                  | YFAS, moderated YFAS, demographic factors                                                                                                   |                     | 5.8% met a full food addiction diagnosis<br><br>The prevalence of FA measured by the mYFAS was 8.4% |          | Women with food addiction were more likely to be overweight                                                                                                                                                                  |                      | Depression was positively correlated with FA                                                                      | Female-only sample<br><br>Used moderated version of YFAS<br><br>Measures of covariates were obtained from retrospective data                       |
| Gearhardt, Corbin, and Brownell (2009)<br>Appetite            | 233 undergraduate females (64.2%) and males (35.8%)                         | Development of the YFAS using BES, BIS/BAS, ETM, EES, RAPI, DDQ                                                                             |                     | 11.4% met FA diagnosis<br><br>Median symptom count was 1                                            |          | YFAS symptom count was a significant predictor of binge eating scores after controlling for EAT and EES, explaining 14.8% of unique variance<br><br>In the same way, YFAS diagnostic count explained 5.8% of unique variance |                      | A small but significant correlation was found between YFAS scores and problematic alcohol use and BIS but not BAS | Large sample but biased towards undergraduate students<br><br>All self-report measures                                                             |
| Gearhardt et al. (2011)<br>Archives of General Psychiatry     | 39 females<br><br>Excluded those with eating disorders and Axis I disorders | BMI, YFAS, DEBQ, fMRI<br><br>Participants split into high FA group with 3 or more symptoms (N=15) or low FA with 1 or fewer symptoms (N=11) |                     | High FA group endorsed 3.6 symptoms on average (SD 0.63)<br><br>Low FA group endorsed 1 symptom     |          | YFAS scores correlated with emotional eating and external eating subscales of the DEBQ                                                                                                                                       |                      |                                                                                                                   | Small, female only sample<br><br>Measured brain reactivity using fMRI in response to anticipated and actual palatable food consumption (milkshake) |

Legend: BIS = Behavioural Inhibition Scale; BAS = Behavioural Approach Scale; ETM = Eating Troubles Module; EES = Emotional Eating Scale; RAPI = Rutgers Alcohol Problem Index; DDQ = Daily Drinking Questionnaire; fMRI = Functional Magnetic Resonance Imaging

**Supplemental Table 1. Continued**

| Investigators                                                          | Sample                                                        | Measures                                         | Prevalence                                                                                                                                                                                 |                    |          | Correlates                                                                                                                                                                                                                                                                |                      |                                                                                                                                                                                                                     | Critical Analysis                                           |
|------------------------------------------------------------------------|---------------------------------------------------------------|--------------------------------------------------|--------------------------------------------------------------------------------------------------------------------------------------------------------------------------------------------|--------------------|----------|---------------------------------------------------------------------------------------------------------------------------------------------------------------------------------------------------------------------------------------------------------------------------|----------------------|---------------------------------------------------------------------------------------------------------------------------------------------------------------------------------------------------------------------|-------------------------------------------------------------|
|                                                                        |                                                               |                                                  | Obese or Overweight                                                                                                                                                                        | General Population | Children | Problematic Eating                                                                                                                                                                                                                                                        | Weight Loss Outcomes | Psychological Wellbeing                                                                                                                                                                                             |                                                             |
| Gearhardt et al. (2012)<br>International Journal of Eating Disorders   | 81 obese women (70.1%) and men treatment seeking BED patients | EDE, YFAS, BDI, DERS, RSE, height and weight     | 56.8% met diagnostic FA threshold                                                                                                                                                          |                    |          |                                                                                                                                                                                                                                                                           |                      |                                                                                                                                                                                                                     |                                                             |
|                                                                        |                                                               |                                                  | Mean number of FA symptoms met was 4.56 (SD 1.9)<br><br>Of those not meeting FA diagnosis (N=35), 57.1% endorsed 3 or more symptoms but did not meet the threshold for clinical impairment |                    |          | YFAS scores were significantly positively correlated with frequency of binge eating episodes and with EDE eating, shape and weight concern and global EDE score                                                                                                           |                      | FA was not associated with anxiety, alcohol or drug use but was significantly associated with a greater likelihood of mood disorder diagnoses, negative affect emotional dysregulation and lower self-esteem        | Female-biased, small sample<br><br>All self-report measures |
| Gearhardt, White, Masheb, and Grilo (2013)<br>Comprehensive Psychiatry | 96 obese female (N=72) and male (N=24) patients with BED      | EDE, YFAS, BDI, DERS, QWERP-R, height and weight | 41.5% met diagnostic FA threshold                                                                                                                                                          |                    |          |                                                                                                                                                                                                                                                                           |                      |                                                                                                                                                                                                                     |                                                             |
|                                                                        |                                                               |                                                  | Mean number of FA symptoms met was 4.33 (SD 1.81)                                                                                                                                          |                    |          | YFAS scores were significantly positively correlated with frequency of binge eating episodes and with EDE eating, shape and weight concern and global EDE score<br><br>YFAS scores were associated with an earlier age of first being overweight and age of dieting onset |                      | YFAS diagnosis was not associated with mood, anxiety, alcohol or drug use disorders<br><br>YFAS symptom count was significantly correlated with higher negative affect, emotion dysregulation and lower self-esteem | Female-biased sample<br><br>All self-report measures        |

Legend: DERS = Difficulties in Emotion Regulation Scale; RSE = Rosenberg Self-Esteem Scale; QWERP-R = Questionnaire on Eating and Weight Problems – Revised.

**Supplemental Table 1. Continued**

| Investigators                                                                | Sample                                                     | Measures                                       | Prevalence                                     |                                                                                                           |                                  | Correlates                                                                                                                                                                                                                                                                                                 |                      |                         |                                                                                                                                                                                                            |
|------------------------------------------------------------------------------|------------------------------------------------------------|------------------------------------------------|------------------------------------------------|-----------------------------------------------------------------------------------------------------------|----------------------------------|------------------------------------------------------------------------------------------------------------------------------------------------------------------------------------------------------------------------------------------------------------------------------------------------------------|----------------------|-------------------------|------------------------------------------------------------------------------------------------------------------------------------------------------------------------------------------------------------|
|                                                                              |                                                            |                                                | Obese or Overweight                            | General Population                                                                                        | Children                         | Problematic Eating                                                                                                                                                                                                                                                                                         | Weight Loss Outcomes | Psychological Wellbeing | Critical Analysis                                                                                                                                                                                          |
| Gearhardt, Roberto, Seamans, Corbin, and Brownell (2013)<br>Eating Behaviors | 75 children, 42.7% female, average age 8.32 years          | Development of YFAS-C using BMI, CEBQ          |                                                |                                                                                                           | 7.2% met FA diagnostic threshold | Elevated scores on the YFAS-C were related to higher BMI and higher levels of emotional overeating                                                                                                                                                                                                         |                      |                         | Used moderated version of the YFAS for children – limited generalisation to adult samples<br><br>Near-even male-female gender split<br><br>Low prevalence of FA means limited assessment of FA in children |
| Gearhardt, Rizk, and Treat (2014)<br>Appetite                                | 89 overweight and obese women                              | EDE-Q, YFAS, BMI, food stimuli, hunger ratings | Mean number of YFAS symptoms endorsed was 3.06 |                                                                                                           |                                  | YFAS symptom count was a moderate predictor of cravings for low processed and fat based foods<br><br>Those who reported more YFAS symptoms craved more than their peers<br><br>FA was associated with higher current and lifetime BMI, earlier age of first dieting, time spent dieting and weight cycling |                      |                         | Female only sample<br><br>Craving and liking were in response to photos of food only, not actual food                                                                                                      |
| Gearhardt, Boswell, and White (2014)<br>Eating Behaviors                     | 815 community female (N=717) and male (N= 97) participants | EDE-Q, QEWP-R, YFAS                            |                                                | 25.7% (N=207) met the diagnostic threshold for FA<br><br>Mean number of symptoms endorsed was 3.05 (SD 2) |                                  | FA was associated with binge eating behaviours, dietary restraint, shape, weight and eating concern                                                                                                                                                                                                        |                      |                         | Female-biased sample but a large community population<br><br>Self-report measures only<br><br>Included comparison of eating pathology across FA/BN groups                                                  |

Legend: YFAS-C = YFAS for children; CEBQ = Children's Eating Behaviour Questionnaire

**Supplemental Table 1. Continued**

| Investigators                                             | Sample                                                                                                | Measures                                       | Prevalence                                   |                                                                                          |                                                                                                                                                        | Correlates                                                                                                                                                                      |                      |                                                                                                | Critical Analysis                                                                                                   |
|-----------------------------------------------------------|-------------------------------------------------------------------------------------------------------|------------------------------------------------|----------------------------------------------|------------------------------------------------------------------------------------------|--------------------------------------------------------------------------------------------------------------------------------------------------------|---------------------------------------------------------------------------------------------------------------------------------------------------------------------------------|----------------------|------------------------------------------------------------------------------------------------|---------------------------------------------------------------------------------------------------------------------|
|                                                           |                                                                                                       |                                                | Obese or Overweight                          | General Population                                                                       | Eating Disorders                                                                                                                                       | Problematic Eating                                                                                                                                                              | Weight Loss Outcomes | Psychological Wellbeing                                                                        |                                                                                                                     |
| Granero et al. (2014)<br>European Eating Disorders Review | 207 female participants<br>125 eating disorder patients<br>82 healthy controls                        | EDI-2, SCL-90-R, YFAS<br>Development of YFAS-S |                                              | 2.4% of healthy control sample met FA diagnostic threshold<br>Mean symptom count was 1.7 | 72.8% of eating disorder patients met FA diagnostic threshold<br>60% of AN, 81.5% of BN, 76.9% of BED and 72.2% of EDNOS<br>Mean symptom count was 4.7 | BMI and number of binges per week positively correlated with the YFAS-S score                                                                                                   |                      |                                                                                                | Female only sample<br>Control group was not age or BMI matched<br>Uneven split of ED types<br>Used Spanish YFAS     |
| Imperatori et al. (2014)<br>Comprehensive Psychiatry      | 112 overweight/obese females (N=80) and males (N=32) seeking low-energy diet therapy                  | YFAS, BES, SCL-90-R                            | 33.9% (N=38) met the FA diagnostic threshold |                                                                                          |                                                                                                                                                        | Among patients with FA, 28.9% also satisfied criteria for clinical level binge eating, compared to only 4.1% of those without FA                                                |                      | The relationship between FA and psychopathology was entirely mediated by binge eating severity | Female-biased sample<br>Used Italian YFAS<br>WLT seeking sample – motivated to report severe eating psychopathology |
| Innamorati et al. (2015)<br>Eating and Weight Disorders   | 300 overweight/obese females (N=246) and males (N=54)<br>300 healthy controls (231 females, 69 males) | YFAS, BES                                      |                                              |                                                                                          |                                                                                                                                                        | YFAS score was significantly correlated with BES score<br>Both the YFAS-16 score and BES were significantly associated with BMI, accounting for 25% of the variance in the data |                      |                                                                                                | Female-biased sample<br>Control group who did not differ in mean age or gender<br>Used Italian YFAS                 |

Legend: EDI-2 = Eating Disorder Inventory 2; SCL-90-R = Symptom Checklist Revised; YFAS-S = Spanish YFAS

**Supplemental Table 1. Continued**

| Investigators                                                       | Sample                                                               | Measures                                                                                                              | Prevalence                                                                                     |                                   |                  | Correlates                                                                                                                                                                         |                                                                                                                                                                                                  |                                                                                                                                                    | Critical Analysis                                                                                                                                                                            |
|---------------------------------------------------------------------|----------------------------------------------------------------------|-----------------------------------------------------------------------------------------------------------------------|------------------------------------------------------------------------------------------------|-----------------------------------|------------------|------------------------------------------------------------------------------------------------------------------------------------------------------------------------------------|--------------------------------------------------------------------------------------------------------------------------------------------------------------------------------------------------|----------------------------------------------------------------------------------------------------------------------------------------------------|----------------------------------------------------------------------------------------------------------------------------------------------------------------------------------------------|
|                                                                     |                                                                      |                                                                                                                       | Obese or Overweight                                                                            | General Population                | Eating Disorders | Problematic Eating                                                                                                                                                                 | Weight Loss Outcomes                                                                                                                                                                             | Psychological Wellbeing                                                                                                                            |                                                                                                                                                                                              |
| Karlsson et al. (2015)<br>The Journal of Neuroscience               | 13 morbidly obese women<br><br>14 healthy non-obese matched controls | YFAS and other food and personality questionnaire<br><br>PET scanning measured D2 and mu-opioid receptor availability | Mean YFAS score of 18 (SD 11)                                                                  | Mean YFAS score of 7.86 (SD 5.95) |                  | Morbidly obese participants scored significantly higher on the YFAS compared to controls<br><br>YFAS scores were negatively associated with MOR availability in the dorsal caudate |                                                                                                                                                                                                  |                                                                                                                                                    | Female only sample<br><br>PET scanning allowed comparison of MOR and D2R availability                                                                                                        |
| Lent, Eichen, Goldbacher, Wadden, and Foster (2014)<br><br>Obesity  | 178 overweight or obese females (N=133) and males (N=45) seeking WLT | YFAS, height and weight, demographic information                                                                      | 15.2% (N=27) met FA diagnosis at baseline<br><br>FA symptom count at baseline was 2.6 (SD 1.7) |                                   |                  |                                                                                                                                                                                    | No effect of dichotomous or symptom count FA on weight loss after controlling for sex and baseline weight<br><br>Variance in weight change was not significantly different by baseline FA status |                                                                                                                                                    | Adapted the YFAS to only measure FA in the past month<br><br>Studied prospective weight loss and its relationship with FA over 5-6month treatment course<br><br>Motivated WLT seeking sample |
| Mason, Flint, Field, Austin, and Rich-Edwards (2013)<br><br>Obesity | 57,321 female registered nurses in the Nurse's Health Study II       | Measures of physical or sexual abuse in childhood or adolescence, mYFAS                                               |                                                                                                | 8.2% met FA diagnosis             |                  | Women meeting FA diagnosis were 6units of BMI heavier than those not meeting FA criteria<br><br>Almost 2/3 of women with FA were obese compared to ¼ without FA                    |                                                                                                                                                                                                  | Found dose-response associations between physical and sexual abuse severity in childhood or adolescence and the likelihood of adult food addiction | Female only sample<br><br>Used modified (9 item) YFAS limiting generalisability of FA prevalence and covariates<br><br>Abuse questionnaires were retrospective                               |

**Supplemental Table 1. Continued**

| Investigators                                              | Sample                                                                                             | Measures                                                              | Prevalence          |                                                                                                               |                  | Correlates                                                                        |                      |                                                                                                                                                                                                           | Critical Analysis                                                                                                                                        |
|------------------------------------------------------------|----------------------------------------------------------------------------------------------------|-----------------------------------------------------------------------|---------------------|---------------------------------------------------------------------------------------------------------------|------------------|-----------------------------------------------------------------------------------|----------------------|-----------------------------------------------------------------------------------------------------------------------------------------------------------------------------------------------------------|----------------------------------------------------------------------------------------------------------------------------------------------------------|
|                                                            |                                                                                                    |                                                                       | Obese or Overweight | General Population                                                                                            | Eating Disorders | Problematic Eating                                                                | Weight Loss Outcomes | Psychological Wellbeing                                                                                                                                                                                   |                                                                                                                                                          |
| Mason et al. (2014)<br>JAMA Psychiatry                     | 49,408 female registered nurses in the Nurse's Health Study II                                     | mYFAS, PTSD questionnaire assessing trauma exposure and PTSD symptoms |                     | 8% met FA diagnosis                                                                                           |                  |                                                                                   |                      | Dose-response association between the number of lifetime PTSD symptoms and prevalence of food addiction in middle adulthood.<br><br>This was further elevated when PTSD symptoms occurred earlier in life | Female only sample<br><br>Used modified (9 item) YFAS limiting generalisability of FA prevalence and covariates<br><br>PTSD was measured retrospectively |
| Meule, Skirde, Freund, Voge, and Kubler (2012)<br>Appetite | 56 healthy weight females (N=47) and males (N=9)<br><br>High cravers (N=28) and low cravers (N=28) | FCQ, EDE-Q, YFAS, photographic food stimuli, n-back response task     |                     | FA symptom count mean was 1.11 in the low cravers group (SD .50) and 2.54 in the high cravers group (SD 1.35) |                  | High cravers reported more eating related psychopathology as measured by the YFAS |                      |                                                                                                                                                                                                           | Small sample size, predominantly female<br><br>Measured behavioural responses to photo stimuli of high calorie savoury and sweet food                    |
| Meule, Lutz, Voge, and Kubler (2012)<br>Appetite           | 617 participants (75.8% female)                                                                    | FCQ-trait, YFAS, RS-CD, PSRS, FC12, RC16, EDEQ, MaCS, BIS, PANAS      |                     |                                                                                                               |                  | Food addiction symptoms were positively related to FCQ-T scores                   |                      |                                                                                                                                                                                                           | Female-biased sample<br><br>Focused on the psychometrics of German YFAS                                                                                  |
| Meule, Lutz, Voge, and Kubler (2012)<br>Eating Behaviors   | 50 normal weight female students                                                                   | YFAS, CES-D, BIS, -15, FCQ (state version), XY response task          |                     | Mean FA symptom count was .83 (SD .38) in low FA and 2.65 (SD .75) in high FA group                           |                  | FA symptoms positively correlated with BMI                                        |                      | Food addiction symptoms were positively correlated with depressive symptoms                                                                                                                               | Female sample<br><br>Split sample into high and low FA groups – did not compare FA to no FA<br><br>Behavioural task                                      |

**Supplemental Table 1. Continued**

| Investigators                                                                              | Sample                                                                                             | Measures                                                | Prevalence                                                                      |                              |                  | Correlates                                                                                                                            |                      |                         | Critical Analysis                                                                                                                       |
|--------------------------------------------------------------------------------------------|----------------------------------------------------------------------------------------------------|---------------------------------------------------------|---------------------------------------------------------------------------------|------------------------------|------------------|---------------------------------------------------------------------------------------------------------------------------------------|----------------------|-------------------------|-----------------------------------------------------------------------------------------------------------------------------------------|
|                                                                                            |                                                                                                    |                                                         | Obese or Overweight                                                             | General Population           | Eating Disorders | Problematic Eating                                                                                                                    | Weight Loss Outcomes | Psychological Wellbeing |                                                                                                                                         |
| Meule and Kubler (2012)<br>Eating Behaviors                                                | 617 participants (75.8% female)                                                                    | FCQ (trait version), YFAS, BMI                          |                                                                                 | 7.8% met FA diagnosis (N=48) |                  | Individuals with a FA diagnosis scored higher on the global FCQ-T and all subscales except positive reinforcement)                    |                      |                         | Female-biased sample<br>Minimal covariate analysis                                                                                      |
| Meule, Heckel, and Kubler (2012)<br>European Eating Disorders Reviews                      | 96 overweight or obese females (N=63) and males (N=33) seeking WLS                                 | YFAS                                                    | 41.70% met FA diagnosis (N=40)<br><br>Mean YFAS symptom count was 3.42 (SD1.74) |                              |                  |                                                                                                                                       |                      |                         | Female-biased, motivated sample<br><br>Assessed factor structure of German YFAS, did not report covariates                              |
| Meule, Freund, Skirde, Voge, and Kubler (2012)<br>Applied Psychophysiology and biofeedback | 56 healthy weight females (N=47) and males (N=9)<br><br>High cravers (N=28) and low cravers (N=28) | FCQ-trait, EDEQ, YFAS, PSRS; ERQ, locus of control, HRV |                                                                                 |                              |                  | More FA symptoms were reported in the high craving control group compared to the high craving biofeedback group and low craving group |                      |                         | Female-biased sample<br><br>Analysed high cravers vs low cravers, not FA vs no-FA<br><br>Identified HRV as a potential treatment for FA |

Legend: PSRS = Perceived Self-Regulatory Success in Dieting Scale; ERQ = Emotion Regulation Questionnaire; HRV = Heart Rate Variability; PTSD = Post-Traumatic Stress Disorder; RS-CD = Restraint Scale-Subscale Concern for Dieting; PSRS = Perceived Self-Regulatory Success in Dieting; FC12 = Flexible Control of Eating Behaviour; RC-16 = Rigid Control of Eating Behaviour; MaCS = Mannheimer Craving Scale; PANAS = Positive and Negative Affect Schedule

**Supplemental Table 1. Continued**

| Investigators                                                               | Sample                                                                                              | Measures                                      | Prevalence                                                                                                                                                                                     |                                            |                                                                                                              | Correlates                                                                                                                                            |                      |                                                                                                                                 | Critical Analysis                                                                                                 |
|-----------------------------------------------------------------------------|-----------------------------------------------------------------------------------------------------|-----------------------------------------------|------------------------------------------------------------------------------------------------------------------------------------------------------------------------------------------------|--------------------------------------------|--------------------------------------------------------------------------------------------------------------|-------------------------------------------------------------------------------------------------------------------------------------------------------|----------------------|---------------------------------------------------------------------------------------------------------------------------------|-------------------------------------------------------------------------------------------------------------------|
|                                                                             |                                                                                                     |                                               | Obese or Overweight                                                                                                                                                                            | General Population                         | Eating Disorders                                                                                             | Problematic Eating                                                                                                                                    | Weight Loss Outcomes | Psychological Wellbeing                                                                                                         |                                                                                                                   |
| Meule, Heckel, Jurowich, Vogeles, and Kubler (2014)<br>Clinical Obesity     | 94 overweight or obese females (N=63) and males (N=33) seeking WLS                                  | YFAS, FCQ, EDEQ, BIS, AUDIT, CES-D            | 40.4% met FA diagnosis (N=38)<br><br>Mean YFAS symptom count was 3.39 (SD1.75)                                                                                                                 |                                            |                                                                                                              | FA group had higher FCQ-T scores and EDE-Q subscales eating, weight and shape concern scores and total EDE-Q<br><br>FA group reported more binge days |                      | FA group scored higher on the BIS attentional impulsivity subscale and had higher CES-D scores<br><br>FA had lower AUDIT scores | Female-biased, motivated sample<br><br>Self-report measures and no follow up after WLS                            |
| Meule, Lutz, Vogeles, and Kubler (2014)<br>Eating Behaviors                 | 50 normal weight female students                                                                    | YFAS, BMI, BIS, FCQ-S, SST                    |                                                                                                                                                                                                | Mean YFAS symptom count was 1.56 (SD 1.05) |                                                                                                              | YFAS symptom count was positively correlated with BMI<br><br>YFAS symptoms were not associated with FCQ-S scores                                      |                      | YFAS scores were not correlated with BIS scores or reaction task performance                                                    | Female only sample<br><br>Included a behavioural food impulsivity measure                                         |
| Meule, von Rezori, and Blechert (2014)<br>European Eating Disorders Reviews | 109 female participants with either current BN (N=26), history of BN (N=20) or control group (N=63) | YFAS, EDE-Q, DEBQ, symptom inventories, CES-D | 30% of remitted BN patients (N=6) received FA diagnosis<br><br>Their mean FA symptom count was 3.95 (SD1.79)<br><br>None of the control group met FA diagnosis (mean symptom count .86 (SD.90) |                                            | All current BN patients (N=26) received an FA diagnosis<br><br>Their mean FA symptom count was 6.27 (SD1.04) | FA group had higher eating disorder psychopathology<br><br>YFAS symptom count was positively correlated with all measures of eating disorders         |                      | FA group had higher general psychopathology<br><br>YFAS symptom count was positively correlated with general psychopathology    | Female only sample<br><br>Self-report measures only<br><br>Analysed FA specifically in relation to BN and not BED |

Legend: AUDIT = Alcohol Use Disorders Identification Test; BN = Bulimia Nervosa; SST = Stop Signal Task

**Supplemental Table 1. Continued**

| Investigators                                                          | Sample                                                                           | Measures                                     | Prevalence                                                                          |                                                                      |                  | Correlates                                                                                                           |                      |                                                                                                     | Critical Analysis                                                                                                                                                                                                     |
|------------------------------------------------------------------------|----------------------------------------------------------------------------------|----------------------------------------------|-------------------------------------------------------------------------------------|----------------------------------------------------------------------|------------------|----------------------------------------------------------------------------------------------------------------------|----------------------|-----------------------------------------------------------------------------------------------------|-----------------------------------------------------------------------------------------------------------------------------------------------------------------------------------------------------------------------|
|                                                                        |                                                                                  |                                              | Obese or Overweight                                                                 | General Population                                                   | Eating Disorders | Problematic Eating                                                                                                   | Weight Loss Outcomes | Psychological Wellbeing                                                                             |                                                                                                                                                                                                                       |
| Meule, Hermann, and Kubler (2015)<br>European Eating Disorders Reviews | 50<br>overweight or obese adolescent females (N=31) and males (N=19) seeking WLT | YFAS, FCQ-T, EDE-Q, BIS, CES-D               | 38% (N=19) received an FA diagnosis<br><br>Mean FA symptom count was 3.38 (SD 2.11) |                                                                      |                  | Food addicts had higher eating, weight and shape concerns, reported more days binge eating and food craving episodes |                      | Food addicts had more symptoms of depression and scored higher on attentional and motor impulsivity | Motivated sample to qualify for WLT<br><br>Small sample, predominantly female<br><br>Patients were mid-WLT but the study did not follow up post WLT                                                                   |
| Murphy, Stojek, and MacKillop (2014)<br>Appetite                       | 233 students<br><br>Females N=179<br><br>Males N=54                              | UPPS-P, YFAS                                 |                                                                                     | 24% met FA criteria<br><br>Mean YFAS symptom count was 1.80 (SD1.39) |                  | FA was significantly positively correlated with BMI                                                                  |                      | FA was correlated with increased scores on all subscales of the UPPS-P except sensation seeking     | Female biased sample<br><br>Only measured FA and impulsiveness, both by self-report                                                                                                                                   |
| Pedram et al. (2013)<br>PLoS ONE                                       | 652 healthy Canadian females (N=415) and males (N=237)                           | Body composition, YFAS, macronutrient intake | Prevalence of 7.7% in overweight or obese participants                              | 5.4% met FA diagnosis (6.7% in women, 3.0% in men)                   |                  | FA prevalence significantly increased with increasing obesity status regardless of how adiposity was defined         |                      |                                                                                                     | Female biased sample<br><br>Measured body composition (not just BMI) and retrospective food intake and exercise in FA and non-FA groups<br><br>Low prevalence of FA restrains comparison between FA and non-FA groups |

Legend: UPPS-P = Impulsive Behaviour Scale; FCI = Food Craving Inventory

**Supplemental Table 1. Continued**

| Investigators                                                           | Sample                                                                                           | Measures                                                                              | Prevalence                                                                                                                            |                                                                                                   |                  | Correlates                                                                                                                                                                                      |                      |                                                                                                     | Critical Analysis                                                                                                                                                                 |
|-------------------------------------------------------------------------|--------------------------------------------------------------------------------------------------|---------------------------------------------------------------------------------------|---------------------------------------------------------------------------------------------------------------------------------------|---------------------------------------------------------------------------------------------------|------------------|-------------------------------------------------------------------------------------------------------------------------------------------------------------------------------------------------|----------------------|-----------------------------------------------------------------------------------------------------|-----------------------------------------------------------------------------------------------------------------------------------------------------------------------------------|
|                                                                         |                                                                                                  |                                                                                       | Obese or Overweight                                                                                                                   | General Population                                                                                | Eating Disorders | Problematic Eating                                                                                                                                                                              | Weight Loss Outcomes | Psychological Wellbeing                                                                             |                                                                                                                                                                                   |
| Pepino, Stein, Eagon, and Klein (2014)<br>Obesity                       | 44 obese females (N=39) and males (N=5) undergoing WLS                                           | YFAS, DEBQ, FCI                                                                       | FA was identified in 32% of subjects (N=14) before surgery<br><br>WLS resulted in a remission of FA in 13 of the 14 FA subjects (93%) |                                                                                                   |                  | Surgery induced weight loss decreased food cravings in both FA and non-FA groups, but the decrease was greater in the FA group                                                                  |                      |                                                                                                     | Female biased, motivated sample<br><br>Measured patients at baseline and 9 month follow up<br><br>Longitudinal effects of FA on weight loss                                       |
| Reslan, Saules, Greenwald, and Schuh (2014)<br>Substance Use and Misuse | 141 post-WLS females (N=112) and males (N=29), at least 24 months post WLS                       | Preoperative and current BMI, MAST-AD, ASSIST, YFAS, NEQ, PFS, TFEQ, QEWP-R, EDE, EES | 36% (N=53) met criteria for pre-surgical food addiction                                                                               |                                                                                                   |                  | Significant correlation between YFAS symptom count and NEQ<br><br>YFAS symptom count was associated with BMI                                                                                    |                      | Post-RYGB patients who also endorsed substance use criteria had significantly higher scores on YFAS | Female biased, motivated sample<br><br>Pre-surgical measurements were all retrospective<br><br>No follow-up                                                                       |
| Schulte, Avena, and Gearhardt (2015)<br>PLoS ONE                        | Study 1: 120 students (92 female, 28 male)<br><br>Study 2: 384 females (N=156) and males (N=228) | Study 1: YFAS, forced choice task<br><br>Study 2: YFAS, food ratings                  |                                                                                                                                       | Study 1: Mean FA symptom count 1.85 (SD1.33)<br><br>Study 2: Mean FA symptom count 2.38 (SD 1.73) |                  | Level of processing led to the most problematic, addictive-like eating behaviours<br><br>Level of processing was a positive predictor of food ratings of problematic addictive eating behaviour |                      |                                                                                                     | Female biased sample<br><br>Only photos of foods were used, no real food intake or anticipated intake was measured but forced choice task measured behavioural responses to foods |

Legend: NEQ = Night Eating Scale; TFEQ = Three Factor Eating Questionnaire; QEWP-R = Questionnaire on Eating and Weight Patterns – Revised
